# Supplementary material for: Selective and unexpected transformations of 2-methylpropane to 2,3-dimethylbutane and 2-methylpropene to 2,3-dimethylbutene catalyzed by an alumina-supported tungsten hydride
Source: Royal Society of Chemistry journal article supplement (doi:10.1039/b823226a), 2009-01-01
Supplement: b823226a.pdf [file b823226a.pdf]

## Supplementary Information

### Selective and Unexpected Transformations of 2-Methylpropane to 2,3-Dimethylbutane and 2-Methylpropene to 2,3-Dimethylbutene Catalyzed by an Alumina-Supported Tungsten Hydride\*\*

Nicolas Merle, François Stoffelbach, Mostafa Taoufik\*, Erwan Le Roux, Jean Thivolle-Cazat, Jean-Marie Basset\*

Université Lyon 1, Institut de Chimie de Lyon; CPE Lyon; CNRS, UMR 5265 C2P2, LCOMS; Bâtiment 308 F 43 Blvd du 11 Novembre 1918 F-69616, Villeurbanne Cedex France

Fax: (+33) (0)4 72 43 17 95

E-mail: [taoufik@cpe.fr](mailto:taoufik@cpe.fr), [basset@cpe.fr](mailto:basset@cpe.fr)

**General procedure:** all operations were performed with rigorous exclusion of air and water; standard Schlenk, high-vacuum and glovebox techniques were used for the preparation or handling of organometallic compounds and alumina supported materials.

The silica supported tantalum hydride **1a** and the alumina supported tungsten hydride **1b** were prepared as already reported.<sup>1</sup> Elemental analyses were performed at the Service Central d'Analyses of CNRS in Solaize (France).

**Reaction of isobutane and isobutene metathesis in a continuous flow reactor:** the metal hydride was charged using a glove box, into a stainless steel ½' cylinder reactor which can be isolated from atmosphere. After connection to the gas lines and purge of tubes, a flow of isobutane (or isobutene) controlled by a Brooks® mass flow-meter was sent onto the catalyst bed which was heated at 150°C. Hydrocarbon products and hydrogen were analyzed on line by GC (HP 8890 chromatograph fitted with an Al<sub>2</sub>O<sub>3</sub>/KCl 50m × 0.32mm capillary column, FID detector for hydrocarbons and a 3Å molecular sieve column, TCD detector for hydrogen).

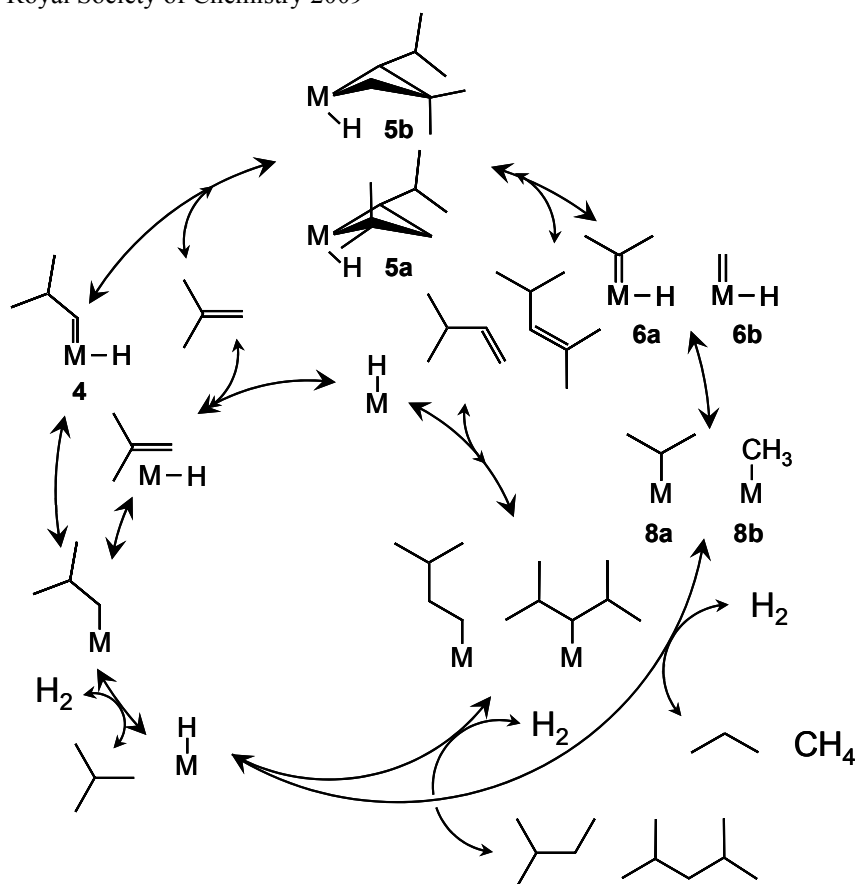

**Scheme S1.** Classical mechanism of alkane metathesis applied to isobutane (M = Ta, W).

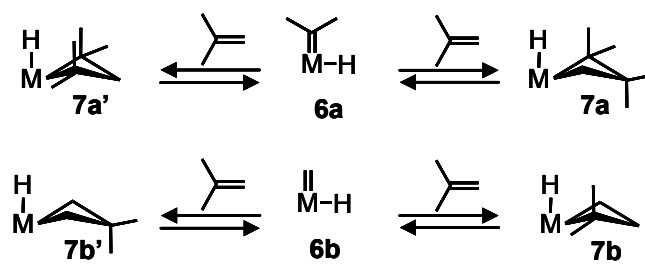

**Scheme S2**

<sup>1</sup> V. Vidal, A. Theolier, J. Thivolle-Cazat, J. M. Basset, *Science* 1997, 276, 99. J. M. Basset, C. Coperet, L. Lefort, B. M. Maunders, O. Maury, E. Le Roux, G. Saggio, S. Soignier, D. Soulivong, G. J. Sunley, M. Taoufik, J. Thivolle-Cazat, *J. Am. Chem. Soc.* **2005**, 127, 8604. E. Le Roux, M. Taoufik, A. Baudouin, C. Coperet, J. Thivolle-Cazat, J. M. Basset, B. M. Maunders, G. J. Sunley, *Adv. Synth. Catal.* **2007**, 349, 231. M. Taoufik, E. Le Roux, J. Thivolle-Cazat, J. M. Basset, *Angew. Chem., Int. Ed.* **2007**, 46, 7202.
